# Supplementary material
Source: Springer Nature journal article supplement (https://www.springermedizin.de/resource/supplementary/12982_2009_82_MOESM5_ESM.pdf/9604432)

Overall Expected Effectiveness

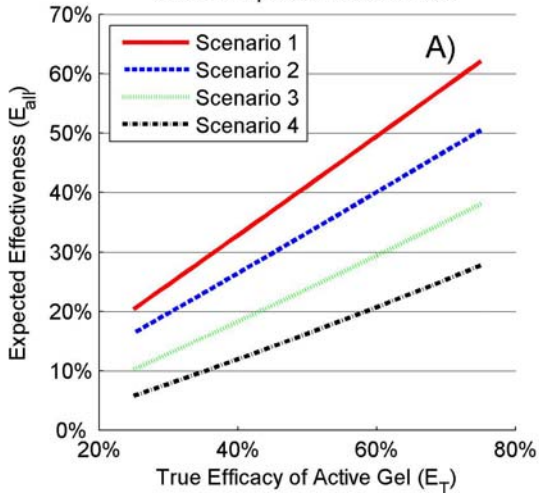

Total Dilution Effect (D)

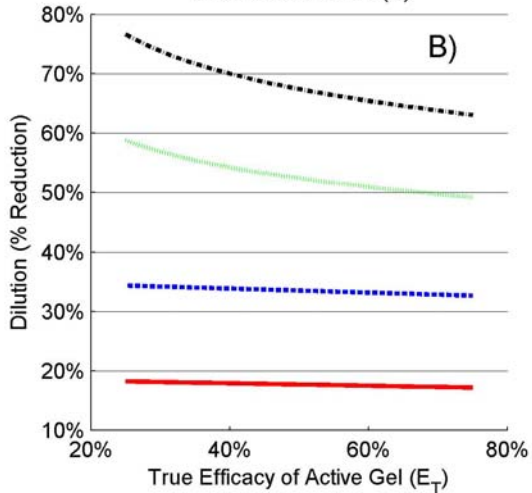

Supplement: MOESM5 [file 9604432]
